# Supplementary material for: Risk of hematological malignancies from CT radiation exposure in children, adolescents and young adults
Source: PubMed Central journal article supplement (PMC10719096; doi:10.1038/s41591-023-02620-0), 2023-11-09
Supplement: 41591_2023_2620_MOESM1_ESM.pdf [file 41591_2023_2620_MOESM1_ESM.pdf]

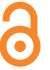

---

# Risk of hematological malignancies from CT radiation exposure in children, adolescents and young adults

---

In the format provided by the authors and unedited

## Supplementary material

### Supplementary Table 1: ICD-O-3 1<sup>st</sup> revision (WHO, 2013) morphology codes included in the analyses

| Main groups <sup>1</sup>                                                                                                                                      | Morphology codes                                                                                                                                                                                                                                                                                                                                                                                                                                                                  | #   |
|---------------------------------------------------------------------------------------------------------------------------------------------------------------|-----------------------------------------------------------------------------------------------------------------------------------------------------------------------------------------------------------------------------------------------------------------------------------------------------------------------------------------------------------------------------------------------------------------------------------------------------------------------------------|-----|
| <b>All haematological malignancies<sup>2</sup></b>                                                                                                            | 9590, 9591, 9596, 9650 - 9653, 9659, 9663, 9665, 9667, 9670, 9671, 9673, 9679, 9680, 9684, 9687, 9690, 9691, 9695, 9698 - 9702, 9708, 9709, 9714, 9718, 9727 - 9729, 9731, 9732, 9735, 9750, 9751, 9754, 9755, 9758, 9761, 9800, 9801, 9805 - 9809, 9811 - 9818, 9820, 9823, 9826, 9827, 9831 - 9837, 9840, 9860, 9861, 9863, 9865 - 9867, 9869 - 9876, 9891, 9895 - 9897, 9910, 9911, 9931, 9940, 9945, 9946, 9948, 9950, 9960 - 9967, 9975, 9980, 9982 - 9986, 9989, 9991, 9992 | 790 |
| <b><i>Lymphoid malignancies</i></b>                                                                                                                           | 9590, 9591, 9596, 9650 - 9653, 9659, 9663, 9665, 9667, 9670, 9671, 9673, 9679, 9680, 9684, 9687, 9690, 9691, 9695, 9698 - 9702, 9708, 9709, 9714, 9718, 9728, 9729, 9731, 9732, 9735, 9761, 9811 - 9818, 9820, 9823, 9826, 9827, 9831 - 9837, 9940, 9948                                                                                                                                                                                                                          | 578 |
| Hodgkin lymphoma                                                                                                                                              | 9650 - 9653, 9659, 9663, 9665, 9667                                                                                                                                                                                                                                                                                                                                                                                                                                               | 190 |
| Non-Hodgkin lymphoma                                                                                                                                          | 9590, 9591, 9596, 9670, 9671, 9673, 9679, 9680, 9684, 9687, 9690, 9691, 9695, 9698 - 9702, 9708, 9709, 9714, 9718, 9728, 9729, 9731, 9732, 9735, 9761, 9811 - 9818, 9823, 9826, 9827, 9831 - 9837, 9940, 9948                                                                                                                                                                                                                                                                     | 387 |
| Mature B-cell neoplasms                                                                                                                                       | 9591, 9596, 9670, 9671, 9673, 9679, 9680, 9684, 9687, 9690, 9691, 9695, 9698, 9699, 9731, 9732, 9735, 9761, 9823, 9826, 9833, 9940                                                                                                                                                                                                                                                                                                                                                | 204 |
| Mature T-cell or NK-cell neoplasms                                                                                                                            | 9700, 9701, 9702, 9708, 9709, 9714, 9718, 9827, 9831, 9834, 9948                                                                                                                                                                                                                                                                                                                                                                                                                  | 29  |
| Precursor cell neoplasms                                                                                                                                      | 9728, 9729, 9811 - 9818, 9835 - 9837                                                                                                                                                                                                                                                                                                                                                                                                                                              | 140 |
| <b><i>Myeloid malignancies and acute leukaemia</i></b>                                                                                                        | 9727, 9801, 9805 - 9809, 9840, 9860, 9861, 9863, 9865 - 9867, 9869 - 9876, 9891, 9895 - 9898, 9910, 9911, 9920, 9931, 9945, 9946, 9950, 9960 - 9967, 9975, 9980, 9982 - 9987, 9989, 9991, 9992                                                                                                                                                                                                                                                                                    | 203 |
| Acute myeloid leukaemia (AML), related precursor malignancies and acute leukaemia of mixed phenotype and ambiguous lineage (ALMP/ALAP)                        | 9727, 9840, 9861, 9865 - 9867, 9869 - 9874, 9891, 9895 - 9897, 9910, 9911, 9931                                                                                                                                                                                                                                                                                                                                                                                                   | 80  |
| Myeloproliferative neoplasms (MPN), Myelodysplastic/myeloproliferative neoplasms (MDS/MPN) together with myelodysplastic syndrome (MDS) - MPN + MDS/MPN + MDS | 9863, 9875, 9876, 9945, 9946, 9950, 9960-9964, 9975, 9980, 9982-9986, 9989, 9991, 9992                                                                                                                                                                                                                                                                                                                                                                                            | 115 |
| <b><i>Histiocytic and dendritic malignancies</i></b>                                                                                                          | 9750, 9751, 9754, 9755, 9758                                                                                                                                                                                                                                                                                                                                                                                                                                                      | 6   |
| <b><i>Unspecified malignancies</i></b>                                                                                                                        | 9800                                                                                                                                                                                                                                                                                                                                                                                                                                                                              | 3   |
| <b><i>Leukaemia excluding CLL (for comparison with previous analyses)</i></b>                                                                                 | 9727, 9801, 9805-9809, 9827, 9835-9837, 9840, 9860, 9861, 9863, 9865-9867, 9869-9876, 9891, 9895-9897, 9910, 9911, 9931, 9940, 9945, 9946, 9948, 9950                                                                                                                                                                                                                                                                                                                             | 271 |

#Number of cases; CLL: chronic lymphocytic leukaemia

<sup>1</sup> Groups based on the 2016 Updated WHO classification of lymphoid neoplasms (Swerdlow et al 2016) and of myeloid neoplasms and acute leukaemia (Arber et al 2016). All identified cases presented the malignancy behaviour code 3 (fifth digit);

<sup>2</sup> Excluding malignancies related to therapy or predisposing syndromes 9898, 9920, 9971, 9987

**Supplementary Table 2: Distribution of study individuals by NHL and Myeloid malignancies and AL subgroups**

|                               | Lymphoid malignancies - NHL |                  |                         |                          | Myeloid malignancies and acute leukaemia     |                                        |                      |
|-------------------------------|-----------------------------|------------------|-------------------------|--------------------------|----------------------------------------------|----------------------------------------|----------------------|
|                               | All NHL                     | Mature cells     |                         | Precursor cell neoplasms | All myeloid malignancies and acute leukaemia | AML and related precursor + ALMP/ALAL* | MPN + MDS/MPN + MDS* |
|                               |                             | B cell neoplasms | T and NK cell neoplasms |                          |                                              |                                        |                      |
| Overall                       | 387                         | 204              | 29                      | 140                      | 203                                          | 80                                     | 115                  |
| Sex                           |                             |                  |                         |                          |                                              |                                        |                      |
| Male                          | 226                         | 117              | 16                      | 86                       | 118                                          | 47                                     | 66                   |
| Female                        | 161                         | 87               | 13                      | 54                       | 85                                           | 33                                     | 49                   |
| Age at first CT (years)       |                             |                  |                         |                          |                                              |                                        |                      |
| <1                            | 58                          | 14               | 4                       | 39                       | 22                                           | 10                                     | 11                   |
| 1-<5                          | 82                          | 38               | 1                       | 41                       | 30                                           | 15                                     | 14                   |
| 5-<10                         | 67                          | 34               | 6                       | 26                       | 33                                           | 14                                     | 16                   |
| 10-<15                        | 65                          | 40               | 8                       | 14                       | 42                                           | 15                                     | 26                   |
| ≥15                           | 115                         | 78               | 10                      | 20                       | 76                                           | 26                                     | 48                   |
| Years since first examination |                             |                  |                         |                          |                                              |                                        |                      |
| 2-<5                          | 142                         | 71               | 6                       | 61                       | 64                                           | 27                                     | 35                   |
| 5-<10                         | 124                         | 57               | 8                       | 56                       | 67                                           | 30                                     | 36                   |
| 10-<15                        | 57                          | 29               | 6                       | 18                       | 35                                           | 12                                     | 20                   |
| ≥15                           | 64                          | 47               | 9                       | 5                        | 37                                           | 11                                     | 24                   |
| Birth cohort                  |                             |                  |                         |                          |                                              |                                        |                      |
| <1980                         | 73                          | 49               | 6                       | 10                       | 45                                           | 15                                     | 29                   |
| 1980-<1985                    | 53                          | 40               | 5                       | 7                        | 47                                           | 15                                     | 32                   |
| 1985-<1990                    | 65                          | 32               | 8                       | 23                       | 35                                           | 14                                     | 17                   |
| 1990-<1995                    | 71                          | 39               | 2                       | 29                       | 34                                           | 14                                     | 18                   |
| 1995-<2000                    | 64                          | 21               | 7                       | 35                       | 24                                           | 14                                     | 9                    |
| 2000-<2005                    | 49                          | 18               | 1                       | 29                       | 11                                           | 5                                      | 6                    |
| ≥2005                         | 12                          | 5                | 0                       | 7                        | 7                                            | 3                                      | 4                    |

|                               | Lymphoid malignancies - NHL |                  |                         |                          | Myeloid malignancies and acute leukaemia     |                                        |                      |
|-------------------------------|-----------------------------|------------------|-------------------------|--------------------------|----------------------------------------------|----------------------------------------|----------------------|
|                               | All NHL                     | Mature cells     |                         | Precursor cell neoplasms | All myeloid malignancies and acute leukaemia | AML and related precursor + ALMP/ALAL* | MPN + MDS/MPN + MDS* |
|                               |                             | B cell neoplasms | T and NK cell neoplasms |                          |                                              |                                        |                      |
| Attained age, years           |                             |                  |                         |                          |                                              |                                        |                      |
| 2-<20                         | 224                         | 93               | 11                      | 115                      | 99                                           | 45                                     | 50                   |
| 20-<30                        | 116                         | 77               | 11                      | 23                       | 78                                           | 29                                     | 46                   |
| 30-<40                        | 44                          | 32               | 6                       | 2                        | 24                                           | 6                                      | 17                   |
| ≥40                           | 3                           | 2                | 1                       | 0                        | 2                                            | 0                                      | 2                    |
| Country                       |                             |                  |                         |                          |                                              |                                        |                      |
| Belgium                       | 3                           | 2                | 0                       | 1                        | 2                                            | 0                                      | 2                    |
| Denmark                       | 5                           | 2                | 1                       | 2                        | 0                                            | 0                                      | 0                    |
| France                        | 35                          | 11               | 2                       | 21                       | 4                                            | 3                                      | 1                    |
| Germany                       | 17                          | 7                | 1                       | 9                        | 4                                            | 1                                      | 3                    |
| The Netherlands               | 68                          | 36               | 4                       | 27                       | 37                                           | 15                                     | 22                   |
| Norway                        | 23                          | 7                | 4                       | 12                       | 11                                           | 8                                      | 3                    |
| Spain                         | 9                           | 5                | 0                       | 4                        | 4                                            | 3                                      | 1                    |
| Sweden                        | 51                          | 26               | 3                       | 20                       | 27                                           | 8                                      | 15                   |
| UK                            | 176                         | 108              | 14                      | 44                       | 114                                          | 42                                     | 68                   |
| Bone marrow dose (range), mGy | 22<br>(0, 286)              | 21<br>(1, 286)   | 22<br>(2, 196)          | 23<br>(0, 243)           | 19<br>(0, 117)                               | 20<br>(0, 95)                          | 18<br>(0, 117)       |

**Supplementary Table 3: Number of CT scans and cumulative dose to the active bone marrow per individual, for all participants and by country**

| Country     | Number of Individuals | Total number of CT exams | Mean number of CT exams per patient | Estimated cumulative ABM dose per patient (mGy) at the end of follow-up |        |     |      |
|-------------|-----------------------|--------------------------|-------------------------------------|-------------------------------------------------------------------------|--------|-----|------|
|             |                       |                          |                                     | Mean                                                                    | Median | Min | Max  |
| Overall     | 876,771               | 1,331,896                | 1.52                                | 15.5                                                                    | 10.7   | 0.0 | 1684 |
| Belgium     | 9,052                 | 12,895                   | 1.42                                | 14.9                                                                    | 11.2   | 0.0 | 431  |
| Denmark     | 15,835                | 29,837                   | 1.88                                | 17.2                                                                    | 10.7   | 0.0 | 630  |
| France      | 104,542               | 153,258                  | 1.47                                | 13.7                                                                    | 11.2   | 0.0 | 670  |
| Germany     | 39,501                | 61,280                   | 1.55                                | 23.1                                                                    | 16.5   | 0.0 | 708  |
| Netherlands | 141,294               | 209,235                  | 1.48                                | 16.1                                                                    | 10.8   | 0.0 | 728  |
| Norway      | 70,942                | 129,463                  | 1.82                                | 14.6                                                                    | 9.4    | 0.0 | 731  |
| Spain       | 67,031                | 96,970                   | 1.45                                | 13.1                                                                    | 9.3    | 0.0 | 1088 |
| Sweden      | 119,056               | 181,405                  | 1.52                                | 16.3                                                                    | 11.9   | 0.0 | 593  |
| UK          | 309,518               | 457,553                  | 1.48                                | 15.3                                                                    | 9.7    | 0.0 | 1684 |

CT: computed tomography; ABM: active bone marrow; Min: minimum; Max: maximum; UK: The United Kingdom

**Supplementary Table 4: Linear ERR/100 mGy by type of haematological malignancies and by country – adjusted for age, sex, birth cohort - restricted to countries with at least 20 cases**

|                      | All haematological malignancies |             |        |       | Lymphoid malignancies |             |        |       | Myeloid malignancies and AL |             |        |       |
|----------------------|---------------------------------|-------------|--------|-------|-----------------------|-------------|--------|-------|-----------------------------|-------------|--------|-------|
|                      | #                               | ERR/100 mGy | 95% CI |       | #                     | ERR/100 mGy | 95% CI |       | #                           | ERR/100 mGy | 95% CI |       |
| <i>All countries</i> | 790                             | 1.96        | 1.10   | 3.12  | 578                   | 2.01        | 1.02   | 3.42  | 203                         | 2.02        | 0.47   | 4.77  |
| <i>By country*</i>   |                                 |             |        |       |                       |             |        |       |                             |             |        |       |
| UK                   | 394                             | 2.69        | 1.30   | 4.81  | 276                   | 2.77        | 1.12   | 5.55  | 114                         | 2.57        | 0.48   | 6.93  |
| All but UK           | 396                             | 1.34        | 0.41   | 2.78  | 302                   | 1.46        | 0.41   | 3.19  | 89                          | 1.21        | -0.53  | 5.67  |
| France               | 47                              | 0.42        | -1.24  | 6.10  | 43                    | 0.41        | -1.26  | 6.50  | 4                           |             |        |       |
| Norway               | 48                              | 0.63        | -0.43  | 4.51  | 36                    | 1.37        | -0.34  | 8.74  | 11                          |             |        |       |
| Sweden               | 107                             | 1.36        | -0.13  | 4.84  | 79                    | 2.41        | 0.18   | 8.83  | 27                          | -1.20       | -1.86  | 2.48  |
| Netherlands          | 137                             | 1.48        | 0.00   | 4.70  | 98                    | 1.10        | -0.20  | 4.33  | 37                          | 3.94        | -0.57  | 43.80 |
| Others‡              | 57                              | 2.85        | 0.06   | 14.30 | 46                    | 1.76        | -0.39  | 11.72 | 10                          |             |        |       |
| <i>Removing</i>      |                                 |             |        |       |                       |             |        |       |                             |             |        |       |
| Belgium              | 785                             | 1.93        | 1.07   | 3.09  | 575                   | 1.99        | 1.01   | 3.40  | 201                         | 1.96        | 0.42   | 4.69  |
| Denmark              | 782                             | 1.94        | 1.08   | 3.10  | 571                   | 1.94        | 0.97   | 3.34  | 203                         | 2.02        | 0.47   | 4.77  |
| France               | 743                             | 2.05        | 1.15   | 3.29  | 535                   | 2.13        | 1.08   | 3.66  | 199                         | 2.05        | 0.48   | 4.85  |
| Germany              | 767                             | 1.95        | 1.07   | 3.14  | 559                   | 2.09        | 1.06   | 3.58  | 199                         | 1.76        | 0.28   | 4.38  |
| Netherlands          | 653                             | 2.05        | 1.10   | 3.38  | 480                   | 2.24        | 1.09   | 3.94  | 166                         | 1.81        | 0.28   | 4.63  |
| Norway               | 742                             | 2.10        | 1.18   | 3.38  | 542                   | 2.07        | 1.02   | 3.58  | 192                         | 2.36        | 0.64   | 5.49  |
| Spain                | 769                             | 1.95        | 1.09   | 3.13  | 561                   | 2.02        | 1.02   | 3.46  | 199                         | 1.97        | 0.44   | 4.68  |
| Sweden               | 683                             | 2.06        | 1.12   | 3.37  | 499                   | 1.94        | 0.90   | 3.46  | 176                         | 2.70        | 0.79   | 6.29  |
| UK                   | 396                             | 1.34        | 0.41   | 2.78  | 302                   | 1.46        | 0.41   | 3.19  | 89                          | 1.21        | -0.53  | 5.67  |

AL: acute leukaemia; # Number of haematological malignancy cases | ERR: Excess Relative Risk; 95%CI: 95% confidence intervals;

\* Country-specific results presented individually for those with 40 haematological malignancies or more

‡ Others: Belgium, Denmark, Germany and Spain together

**Supplementary Table 5: ERR/100 mGy by lymphoid and myeloid malignancy types by country – analyses stratified on sex, birth cohort and country - restricted to countries with at least 20 cases**

**a. Lymphoid malignancies types**

|                  | NHL     |               |                 |      |                         |               |        |      |                                 |                 |                 |      | HL  |              |                 |      |                          |                 |                 |      |
|------------------|---------|---------------|-----------------|------|-------------------------|---------------|--------|------|---------------------------------|-----------------|-----------------|------|-----|--------------|-----------------|------|--------------------------|-----------------|-----------------|------|
|                  | All NHL |               |                 |      | Mature B-cell neoplasms |               |        |      | Mature T- and NK-cell neoplasms |                 |                 |      |     |              |                 |      | Precursor cell neoplasms |                 |                 |      |
|                  | #       | ERR / 100 mGy | 95% CI          |      | #                       | ERR / 100 mGy | 95% CI |      | #                               | ERR/ 100 mGy    | 95% CI          |      | #   | ERR/ 100 mGy | 95% CI          |      | #                        | ERR/ 100 mGy    | 95% CI          |      |
| <i>All</i>       | 387     | 2.51          | 1.14            | 4.73 | 204                     | 3.15          | 1.17   | 6.88 | 29                              | 2.85            | -0.20           | 20.2 | 140 | 1.26         | -0.05           | 4.34 | 190                      | 1.24            | 0.08            | 3.28 |
| <i>Country</i>   |         |               |                 |      |                         |               |        |      |                                 |                 |                 |      |     |              |                 |      |                          |                 |                 |      |
| UK               | 176     | 3.73          | 1.25            | 8.80 | 108                     | 4.32          | 1.28   | 11.4 | 14                              | <0 <sup>1</sup> | <0 <sup>1</sup> | 6.36 | 44  | 3.18         | -0.56           | 33.4 | 100                      | 1.73            | 0.09            | 5.46 |
| All but UK       | 211     | 1.78          | 0.45            | 4.34 | 96                      | 1.96          | 0.08   | 6.93 | 15                              | 14.19           | 0.61            | Inf  | 96  | 0.94         | -0.21           | 4.04 | 90                       | 0.67            | <0 <sup>1</sup> | 3.60 |
| France           | 35      | -0.47         | <0 <sup>1</sup> | 5.99 |                         | NE            |        |      |                                 | NE              |                 |      | 21  | 2.77         | <0 <sup>1</sup> | Inf  |                          | NE              |                 |      |
| Norway           | 23      | 1.78          | -0.38           | 28.5 |                         | NE            |        |      |                                 | NE              |                 |      |     |              |                 |      |                          | NE              |                 |      |
| Sweden           | 51      | 2.27          | -0.05           | 10.8 | 26                      | 2.62          | -0.34  | 24.8 |                                 | NE              |                 |      | 20  | 1.61         | -0.62           | 19.5 | 27                       | 2.25            | -0.85           | 25.5 |
| Netherlands      | 68      | 2.71          | 0.13            | 12.1 | 36                      | 7.71          | 0.48   | Inf  |                                 | NE              |                 |      | 27  | 0.92         | -0.34           | 8.82 | 30                       | <0 <sup>1</sup> | <0 <sup>1</sup> | 1.51 |
| Other            | 34      | 1.36          | -0.48           | 12.6 |                         | NE            |        |      |                                 | NE              |                 |      |     |              |                 |      |                          | NE              |                 |      |
| <i>Removing:</i> |         |               |                 |      |                         |               |        |      |                                 |                 |                 |      |     |              |                 |      |                          |                 |                 |      |
| Belgium          | 384     | 2.48          | 1.12            | 4.69 | 202                     | 3.07          | 1.14   | 6.73 | 29                              | 2.85            | -0.20           | 20.2 | 139 | 1.28         | -0.04           | 4.38 | 190                      | 1.24            | 0.08            | 3.28 |
| Denmark          | 382     | 2.42          | 1.07            | 4.60 | 202                     | 3.18          | 1.19   | 6.96 | 28                              | 1.84            | -0.37           | 15.0 | 138 | 1.23         | -0.07           | 4.27 | 188                      | 1.22            | 0.07            | 3.24 |
| France           | 352     | 2.81          | 1.28            | 5.36 | 193                     | 3.80          | 1.48   | 8.38 | 27                              | 2.54            | -0.24           | 17.9 | 119 | 1.16         | -0.11           | 4.29 | 182                      | 1.18            | 0.03            | 3.25 |
| Germany          | 370     | 2.65          | 1.19            | 5.03 | 197                     | 3.31          | 1.22   | 7.30 | 28                              | 3.08            | -0.16           | 21.8 | 131 | 1.28         | -0.07           | 4.56 | 188                      | 1.31            | 0.12            | 3.40 |
| Netherlands      | 319     | 2.47          | 1.00            | 4.95 | 168                     | 2.69          | 0.82   | 6.36 | 25                              | 3.03            | -0.19           | 24.7 | 113 | 1.46         | -0.21           | 5.83 | 160                      | 1.82            | 0.32            | 4.62 |
| Norway           | 364     | 2.57          | 1.13            | 4.93 | 197                     | 3.26          | 1.22   | 7.16 | 25                              | 0.87            | -1.23           | 13.6 | 128 | 1.55         | 0.04            | 5.22 | 177                      | 1.28            | 0.07            | 3.50 |
| Spain            | 378     | 2.65          | 1.21            | 4.99 | 199                     | 3.28          | 1.24   | 7.19 | 29                              | 2.85            | -0.20           | 20.2 | 136 | 1.36         | -0.02           | 4.68 | 182                      | 1.13            | 0.02            | 3.10 |
| Sweden           | 336     | 2.56          | 1.06            | 5.09 | 178                     | 3.25          | 1.10   | 7.53 | 26                              | 2.83            | -0.21           | 20.9 | 120 | 1.17         | -0.17           | 4.75 | 163                      | 1.14            | -0.01           | 3.26 |

**b) Myeloid malignancies and AL types**

|                      | AML and related precursor +ALMP/ALAP |                |                 |       | MPN + MDS/MPN + MDS* |                |                 |       |
|----------------------|--------------------------------------|----------------|-----------------|-------|----------------------|----------------|-----------------|-------|
|                      | #                                    | ERR/100<br>mGy | 95% CI          |       | #                    | ERR/100<br>mGy | 95% CI          |       |
| <i>All countries</i> | 80                                   | 2.39           | 0.11            | 8.17  | 115                  | 1.51           | -0.15           | 5.06  |
| <i>By country*</i>   |                                      |                |                 |       |                      |                |                 |       |
| UK                   | 42                                   | 2.85           | -0.09           | 13.0  | 68                   | 2.06           | -0.13           | 7.82  |
| All but UK           | 38                                   | 1.75           | <0 <sup>1</sup> | 13.4  | 47                   | 0.55           | <0 <sup>1</sup> | 6.90  |
| Netherlands          | 15                                   | 6.57           | <0 <sup>1</sup> | Inf   | 22                   | 2.10           | <0 <sup>1</sup> | 108.2 |
| <i>Removing</i>      |                                      |                |                 |       |                      |                |                 |       |
| Belgium              | 80                                   | 2.39           | 0.11            | 8.17  | 113                  | 1.38           | -0.23           | 4.89  |
| Denmark              | 80                                   | 2.39           | 0.11            | 8.17  | 115                  | 1.51           | -0.15           | 5.06  |
| France               | 77                                   | 2.45           | 0.11            | 8.51  | 114                  | 1.52           | -0.15           | 5.10  |
| Germany              | 79                                   | 2.01           | -0.14           | 7.40  | 112                  | 1.33           | -0.25           | 4.75  |
| Netherlands          | 65                                   | 1.92           | -0.18           | 7.61  | 93                   | 1.44           | -0.23           | 5.23  |
| Norway               | 72                                   | 2.87           | 0.27            | 9.82  | 112                  | 1.75           | -0.06           | 5.72  |
| Spain                | 77                                   | 2.36           | 0.09            | 8.11  | 114                  | 1.44           | -0.18           | 4.92  |
| Sweden               | 72                                   | 3.14           | 0.36            | 10.74 | 100                  | 2.15           | 0.09            | 6.88  |
| UK                   | 38                                   | 1.75           | -0.73           | 13.37 | 47                   | 0.55           | <0 <sup>1</sup> | 6.90  |

# Number of haematological malignancy cases; ERR: Excess Relative Risk; 95%CI: 95% confidence intervals; NE: not estimated as fewer than 20 cases; Inf: Infinite; NHL: non-Hodgkin lymphoma; HL; Hodgkin lymphoma; NK; natural killer; AL: Acute leukaemia; AML; acute myeloid leukaemia; ALMP: acute leukaemia of mixed phenotype; ALAL; acute leukaemia of ambiguous lineage; MPN: myeloproliferative neoplasm; MDS; myelodysplastic syndrome; MDS/MPN: myelodysplastic/myeloproliferative neoplasm

<sup>1</sup>The estimate is on the boundary of the parameter space



**Supplementary Table 6: Results of sensitivity analyses**

|                                                                     | All haematological malignancies |                 |        |      | Lymphoid malignancies |                 |        |      | Myeloid malignancies and AL |                 |        |      |
|---------------------------------------------------------------------|---------------------------------|-----------------|--------|------|-----------------------|-----------------|--------|------|-----------------------------|-----------------|--------|------|
|                                                                     | #                               | ERR/ 100<br>mGy | 95% CI |      | #                     | ERR/ 100<br>mGy | 95% CI |      | #                           | ERR/ 100<br>mGy | 95% CI |      |
| Main results                                                        | 790                             | 1.96            | 1.10   | 3.12 | 578                   | 2.01            | 1.02   | 3.42 | 203                         | 2.02            | 0.47   | 4.77 |
| ABM doses                                                           |                                 |                 |        |      |                       |                 |        |      |                             |                 |        |      |
| Doses lagged by 1 year                                              | 790                             | 1.99            | 1.13   | 3.16 | 578                   | 2.04            | 1.05   | 3.47 | 203                         | 2.07            | 0.54   | 4.80 |
| Doses lagged by 5 years                                             | 790                             | 1.06            | 0.45   | 1.82 | 578                   | 1.25            | 0.53   | 2.20 | 203                         | 0.60            | -0.43  | 2.20 |
| Use of median of all dose realisations dose instead of mean         | 790                             | 2.08            | 1.09   | 3.42 | 578                   | 2.13            | 0.99   | 3.75 | 203                         | 2.17            | 0.36   | 5.35 |
| Analyses restricted to individuals with cumulative doses up to the: |                                 |                 |        |      |                       |                 |        |      |                             |                 |        |      |
| 99 <sup>th</sup> percentile                                         | 777                             | 3.17            | 1.90   | 4.91 | 567                   | 3.02            | 1.59   | 5.09 | 201                         | 3.81            | 1.43   | 8.20 |
| 98 <sup>th</sup> percentile                                         | 761                             | 3.54            | 2.08   | 5.55 | 554                   | 3.27            | 1.66   | 5.63 | 198                         | 4.43            | 1.67   | 9.62 |
| 95 <sup>th</sup> percentile                                         | 710                             | 2.80            | 1.27   | 4.94 | 520                   | 2.79            | 1.02   | 5.41 | 181                         | 2.88            | 0.34   | 7.75 |
| <i>Exclusions</i>                                                   |                                 |                 |        |      |                       |                 |        |      |                             |                 |        |      |
| 5 years from 1 <sup>st</sup> CT                                     | 524                             | 2.36            | 1.21   | 4.05 | 381                   | 2.54            | 1.19   | 4.66 | 139                         | 1.74            | 0.05   | 5.25 |
| 10 years from 1 <sup>st</sup> CT                                    | 261                             | 2.67            | 1.02   | 5.69 | 185                   | 3.12            | 1.13   | 7.08 | 72                          | 1.28            | -0.62  | 8.11 |
| Individuals born before the start of cancer registration            | 490                             | 1.54            | 0.68   | 2.80 | 365                   | 1.59            | 0.60   | 3.14 | 119                         | 1.84            | 0.20   | 5.29 |
| Hospitals with low reporting consistency                            | 603                             | 1.93            | 0.97   | 3.29 | 440                   | 2.17            | 1.00   | 3.93 | 158                         | 1.49            | 0.00   | 4.31 |
| Follow-up 2 years after country-specific maximum age at exposure    | 491                             | 1.27            | 0.49   | 2.39 | 356                   | 1.26            | 0.39   | 2.63 | 128                         | 1.61            | 0.11   | 6.61 |
| Individuals with no vital status                                    | 739                             | 1.73            | 0.89   | 2.97 | 541                   | 1.91            | 0.91   | 3.35 | 189                         | 1.39            | 0.03   | 3.85 |
| UK - main results                                                   |                                 | NA              |        |      | 276                   | 2.77            | 1.12   | 5.55 |                             | NA              |        |      |
| Excluding individuals who underwent transplant                      |                                 | NA              |        |      | 256                   | 2.57            | 0.97   | 5.31 |                             | NA              |        |      |

# Number of haematological malignancies cases; ERR: Excess Relative Risk; 95%CI: 95% confidence intervals; NA: not applicable; AL: Acute leukaemia

**Supplementary Table 7: RR and 95% CI by category of number of CT examinations and ERR/ per examination for haematological malignancies– analyses stratified on sex, birth cohort and country**

| Number of examinations | All haematological malignancies |              |        |      | Lymphoid malignancies |              |        |      | Myeloid malignancies and AL |              |        |      |
|------------------------|---------------------------------|--------------|--------|------|-----------------------|--------------|--------|------|-----------------------------|--------------|--------|------|
|                        | #                               | RR           | 95% CI |      | #                     | RR           | 95% CI |      | #                           | RR           | 95% CI |      |
| 1                      | 482                             | 1.00         |        |      | 355                   | 1.00         |        |      | 122                         | 1.00         |        |      |
| 2-3                    | 195                             | 1.53         | 1.30   | 1.81 | 132                   | 1.39         | 1.13   | 1.70 | 59                          | 1.95         | 1.43   | 2.66 |
| 4-5                    | 66                              | 2.05         | 1.48   | 2.84 | 53                    | 2.32         | 1.62   | 3.32 | 13                          | 1.32         | 0.58   | 3.00 |
| 6+                     | 47                              | 2.84         | 1.99   | 4.04 | 38                    | 2.90         | 1.93   | 4.35 | 9                           | 2.80         | 1.37   | 5.74 |
| <i>P for trend</i>     |                                 | <i>0.12</i>  |        |      |                       | <i>0.18</i>  |        |      |                             | <i>0.12</i>  |        |      |
|                        | #                               | ERR/<br>exam | 95% CI |      | #                     | ERR/<br>exam | 95% CI |      | #                           | ERR/<br>exam | 95% CI |      |
|                        | 790                             | 0.43         | 0.25   | 0.73 | 579                   | 0.42         | 0.22   | 0.77 | 203                         | 0.48         | 0.13   | 1.51 |

# Number of haematological malignancies cases; RR: Relative Risk; 95%CI: 95% confidence intervals; ERR: Excess Relative Risk; exam: examination; AL: Acute leukaemia

**Supplementary Table 8: Relative risks (and 95% CIs) comparison with previously published results· Risk estimates are reported as per the original studies and as recalculated with the EPI-CT dose estimates**

|                                                                                                               | Dosimetry          | RR<br>#          | RR (95% CI)<br>#  | RR (95% CI)<br># | RR (95% CI)<br>#  | RR (95% CI)<br># | RR (95% CI)<br>#  | RR (95% CI)<br># | RR (95% CI)<br># | RR (95% CI)<br>#  | RR (95% CI)<br># | RR (95% CI)<br>#  | RR (95% CI)<br># | RR (95% CI)<br>#  | RR (95% CI)<br># | RR (95% CI)<br>#  | RR (95% CI)<br># | ERR/100 mGy<br>(95% CI) # | ERR/100 mGy<br>(95% CI) # |
|---------------------------------------------------------------------------------------------------------------|--------------------|------------------|-------------------|------------------|-------------------|------------------|-------------------|------------------|------------------|-------------------|------------------|-------------------|------------------|-------------------|------------------|-------------------|------------------|---------------------------|---------------------------|
| <b>Leukaemia excluding CLL</b>                                                                                |                    |                  |                   |                  |                   |                  |                   |                  |                  |                   |                  |                   |                  |                   |                  |                   |                  |                           |                           |
| <b>All countries</b>                                                                                          | <b>Doses (mGy)</b> | <b>[0,5)</b>     | <b>[5,10)</b>     | <b>[10,15)</b>   | <b>[15,25)</b>    | <b>[25,50)</b>   | <b>50+</b>        |                  |                  |                   |                  |                   |                  |                   |                  |                   |                  |                           |                           |
| EPI- CT all countries                                                                                         | EPI-CT             | <b>1.0</b><br>38 | <b>0.79</b><br>43 | 0.51 1.24<br>56  | <b>1.35</b><br>66 | 0.87 2.09<br>44  | <b>1.21</b><br>24 | 0.78 1.89<br>271 | 1.89<br>24       | <b>1.61</b><br>24 | 1.01 2.58<br>24  | <b>2.41</b><br>24 | 1.40 4.17<br>24  | <b>1.66</b><br>24 | 0.43 3.74<br>24  | <b>1.66</b><br>24 | 0.43 3.74<br>24  | 0.43 3.74<br>24           | 0.43 3.74<br>24           |
| <b>UK definitions</b>                                                                                         | <b>Doses (mGy)</b> | <b>[0,5)</b>     | <b>[5,10)</b>     | <b>[10,15)</b>   | <b>[15,20)</b>    | <b>[20,30)</b>   | <b>30+</b>        |                  |                  |                   |                  |                   |                  |                   |                  |                   |                  |                           |                           |
| <b>Leukaemia excluding CLL and including MDS<sup>1</sup></b>                                                  |                    |                  |                   |                  |                   |                  |                   |                  |                  |                   |                  |                   |                  |                   |                  |                   |                  |                           |                           |
| EPI- CT all countries                                                                                         | EPI-CT             | <b>1.0</b><br>46 | <b>1.00</b><br>62 | 0.67 1.47<br>67  | <b>1.46</b><br>48 | 0.98 2.16<br>54  | <b>1.49</b><br>67 | 0.96 2.30<br>67  | 2.30<br>67       | <b>1.37</b><br>54 | 0.89 2.11<br>67  | <b>2.36</b><br>67 | 1.57 3.56<br>67  | <b>1.88</b><br>67 | 0.65 3.87<br>67  | <b>1.88</b><br>67 | 0.65 3.87<br>67  | 0.65 3.87<br>67           | 0.65 3.87<br>67           |
| UK – EPI-CT cohort and follow-up<br><i>309 518 individuals followed-up to 2013</i>                            | EPI-CT             | <b>1.0</b><br>26 | <b>1.01</b><br>29 | 0.59 1.73<br>27  | <b>1.55</b><br>24 | 0.88 2.72<br>24  | <b>1.70</b><br>24 | 0.93 3.13<br>24  | 3.13<br>24       | <b>1.28</b><br>21 | 0.68 2.40<br>34  | <b>2.82</b><br>34 | 1.61 4.96<br>34  | <b>2.77</b><br>34 | 0.72 6.85<br>34  | <b>2.77</b><br>34 | 0.72 6.85<br>34  | 0.72 6.85<br>34           | 0.72 6.85<br>34           |
| UK – Original study (Pearce et al, 2012)<br><i>178 604 individuals followed-up to 2008</i>                    | EPI-CT             | <b>1</b><br>6    | <b>1.93</b><br>13 | 0.72 5.20<br>17  | <b>4.25</b><br>13 | 1.61 11.2<br>13  | <b>4.23</b><br>13 | 1.48 12.1<br>12  | 12.1<br>12       | <b>3.23</b><br>12 | 1.11 9.39<br>13  | <b>4.94</b><br>13 | 1.74 140<br>13   | <b>3.78</b><br>13 | 0.18 17.5<br>13  | <b>3.78</b><br>13 | 0.18 17.5<br>13  | 0.18 17.5<br>13           | 0.18 17.5<br>13           |
|                                                                                                               | Original           | <b>1</b><br>15   | <b>1.44</b><br>17 | 0.70 2.99<br>12  | <b>2.03</b><br>11 | 0.89 4.54<br>11  | <b>1.53</b><br>11 | 0.63 3.59<br>4   | 3.59<br>4        | <b>2.02</b><br>15 | 0.56 5.83<br>15  | <b>3.18</b><br>15 | 1.46 6.94<br>15  | <b>3.60</b><br>15 | 0.50 12.0<br>15  | <b>3.60</b><br>15 | 0.50 12.0<br>15  | 0.50 12.0<br>15           | 0.50 12.0<br>15           |
| <b>FRANCE definitions</b>                                                                                     | <b>Doses (mGy)</b> | <b>[0,5)</b>     | <b>[5,10)</b>     | <b>[10,19)</b>   | <b>[20+)</b>      |                  |                   |                  |                  |                   |                  |                   |                  |                   |                  |                   |                  |                           |                           |
| <b>Leukaemia excluding CLL and including MDS<sup>1</sup> - CTs up to age 10 and follow-up to age 16 years</b> |                    |                  |                   |                  |                   |                  |                   |                  |                  |                   |                  |                   |                  |                   |                  |                   |                  |                           |                           |
| France - EPI-CT cohort and follow-up<br><i>104542 individuals followed-up till 2013</i>                       | EPI-CT             | <b>1.0</b><br>3  | <b>0.58</b><br>2  | 0.10 3.49<br>15  | <b>1.75</b><br>5  | 0.50 6.16<br>5   | <b>2.00</b><br>5  | 0.47 8.53<br>5   | 8.53<br>5        | <b>2.00</b><br>5  | 0.47 8.53<br>5   | <b>2.00</b><br>5  | 0.47 8.53<br>5   | <b>2.00</b><br>5  | 0.47 8.53<br>5   | <b>2.00</b><br>5  | 0.47 8.53<br>5   | 0.47 8.53<br>5            | 0.47 8.53<br>5            |
| France – original study (Journy et al, 2015) -<br><i>67 274 individuals followed-up till 2010</i>             | Original           | <b>1.0</b><br>6  | <b>1.36</b><br>5  | 0.39 4.54<br>3   | <b>1.00</b><br>3  | 0.21 3.80<br>3   | <b>3.14</b><br>3  | 0.65 12.2<br>3   | 12.2<br>3        | <b>NA</b><br>3    | 0.65 12.2<br>3   | <b>NA</b><br>3    | 0.65 12.2<br>3   | <b>NA</b><br>3    | 0.65 12.2<br>3   | <b>NA</b><br>3    | 0.65 12.2<br>3   | 0.65 12.2<br>3            | 0.65 12.2<br>3            |

| Dosimetry                                                  |          | RR<br>#     | RR (95% CI)<br># |         | RR (95% CI)<br># |             | RR (95% CI)<br># |       | RR (95% CI)<br># |      | RR (95% CI)<br># |             | ERR/100 mGy<br>(95% CI) # |             |             |             |      |     |
|------------------------------------------------------------|----------|-------------|------------------|---------|------------------|-------------|------------------|-------|------------------|------|------------------|-------------|---------------------------|-------------|-------------|-------------|------|-----|
| Doses (mGy)                                                |          | [0,5)       | [5,10)           | [10,17) |                  | [17+)       |                  |       |                  |      |                  |             |                           |             |             |             |      |     |
| <b>Netherlands definitions</b>                             |          |             |                  |         |                  |             |                  |       |                  |      |                  |             |                           |             |             |             |      |     |
| <i>Leukaemia with myelodysplastic diseases<sup>1</sup></i> |          |             |                  |         |                  |             |                  |       |                  |      |                  |             |                           |             |             |             |      |     |
| EPI- CT all countries                                      | EPI-CT   | <b>1.00</b> | <b>0.96</b>      | 0.65    | 1.42             | <b>1.38</b> | 0.94             | 2.01  | <b>1.76</b>      | 1.22 | 2.53             |             |                           | <b>1.79</b> | 0.60        | 3.71        |      |     |
|                                                            |          | 48          | 62               |         |                  | 84          |                  |       | 153              |      |                  |             |                           | 347         |             |             |      |     |
| Netherlands – original study (Meulepas et al, 2019)        | EPI-CT   | <b>1.0</b>  | <b>0.94</b>      | 0.34    | 2.64             | <b>1.83</b> | 0.69             | 4.85  | <b>2.45</b>      | 0.96 | 6.24             |             |                           | <b>2.44</b> | -0.05       | 12.2        |      |     |
|                                                            |          | 6           | 10               |         |                  | 15          |                  |       | 31               |      |                  |             |                           | 62          |             |             |      |     |
|                                                            | Original | <b>1.0</b>  | <b>1.41</b>      | 0.7     | 2.83             | <b>0.88</b> | 0.44             | 1.74  | <b>0.62</b>      | 0.28 | 1.34             |             |                           | <b>0.04</b> | -0.1        | 1.61        |      |     |
|                                                            |          | 20          | 14               |         |                  | 16          |                  |       | 13               |      |                  |             |                           | 63          |             |             |      |     |
| <b>Hodgkin lymphoma</b>                                    |          |             |                  |         |                  |             |                  |       |                  |      |                  |             |                           |             |             |             |      |     |
| Doses (mGy)                                                |          | [0,5)       | [5,10)           | [10,15) |                  | [15,20)     |                  | [20+) |                  |      |                  |             |                           |             |             |             |      |     |
| EPI- CT all countries                                      | EPI-CT   | <b>1.0</b>  | <b>1.01</b>      | 0.65    | 1.56             | <b>1.31</b> | 0.82             | 2.10  | <b>0.86</b>      | 0.46 | 1.63             | <b>1.61</b> | 1.03                      | 2.52        | <b>1.24</b> | 0.08        | 3.28 |     |
|                                                            |          | 38          | 49               |         |                  | 38          |                  |       | 14               |      |                  | 51          |                           |             | 190         |             |      |     |
| UK – EPI-CT cohort and follow-up                           | EPI-CT   | <b>1.0</b>  | <b>1.39</b>      | 0.78    | 2.48             | <b>1.48</b> | 0.76             | 2.90  | <b>1.15</b>      | 0.49 | 2.70             | <b>1.72</b> | 0.91                      | 3.24        | <b>1.73</b> | 0.09        | 5.46 |     |
|                                                            |          | 20          | 30               |         |                  | 17          |                  |       | 8                |      |                  | 25          |                           |             | 100         |             |      |     |
| UK – Original study (Berrington de Gonzales et al, 2017)   | EPI-CT   | <b>1.0</b>  | <b>1.74</b>      | 0.82    | 3.70             | <b>1.54</b> | 0.62             | 3.78  | <b>0.82</b>      | 0.21 | 3.10             | <b>1.67</b> | 0.68                      | 4.10        | NA          | <b>1.10</b> | -0.5 | 6.2 |
|                                                            |          | 11          | 21               |         |                  | 10          |                  |       | 3                |      |                  | 12          |                           |             | 57          |             |      |     |
|                                                            | Original | <b>1.0</b>  | <b>1.00</b>      | 0.54    | 1.86             | <b>0.79</b> | 0.31             | 1.99  | <b>1.05</b>      | 0.41 | 2.68             | <b>0.92</b> | 0.38                      | 2.22        | NA          | <b>0.2</b>  | -1.6 | 2.1 |
|                                                            |          | 27          | 18               |         |                  | 6           |                  |       | 7                |      |                  | 7           |                           |             | 65          |             |      |     |

RR: Relative Risk; ERR: Excess Relative Risk; CLL: chronic lymphocytic leukaemia; #: Number of cases; NA: not available; \*Reference category

<sup>1</sup>ICDO-3 rev 1 morphology included (only tumours with behaviour code 3 (malignant))

- UK (Pearce et al 2012, Supplementary table 1): 9727-9729, 9800, 9801, 9805, 9820, 9835-9837, 9840, 9860, 9861, 9863, 9866, 9867, 9870-9874, 9875, 9876, 9891, 9895- 9897, 9910, 9920, 9930, 9931, 9945, 9946, 9950, 9960-9964, 9975, 9980, 9982-9987, 9989
- France (Journy et al 2015, Supplementary Table 1): 9836, 9837, 9866, 9897, 9910, 9946, 9826, 9983
- Netherlands (Meulepas et al 2018, Supplementary Table 3) : 9727-9729, 9800, 9801, 9805-9809, 9823, 9835-9837, 9840, 9860, 9861, 9863, 9866, 9867, 9870-9874, 9875, 9876, 9891, 9895-9897, 9910, 9920, 9931, 9945, 9946, 9950, 9960-9964, 9965-67, 9975, 9980, 9982-9986, 9987, 9989, 9991, 9992

## References

- Arber, D. A. *et al.* The 2016 revision to the World Health Organization classification of myeloid neoplasms and acute leukemia. *Blood* **127**, 2391–2405 (2016).
- Berrington de Gonzalez, A. *et al.* No Association between Radiation Dose from Pediatric CT Scans and Risk of Subsequent Hodgkin Lymphoma. *Cancer Epidemiol Biomarkers Prev* **26**, 804–806 (2017).
- Journy, N. *et al.* Are the studies on cancer risk from CT scans biased by indication? Elements of answer from a large-scale cohort study in France. *Br J Cancer* **112**, 185–193 (2015).
- Meulepas, J. M. *et al.* Radiation Exposure From Pediatric CT Scans and Subsequent Cancer Risk in the Netherlands. *J Natl Cancer Inst* **111**, 256–263 (2019).
- Pearce, M. S. *et al.* Radiation exposure from CT scans in childhood and subsequent risk of leukaemia and brain tumours: a retrospective cohort study. *Lancet* **380**, 499–505 (2012).
- Swerdlow, S. H. *et al.* The 2016 revision of the World Health Organization classification of lymphoid neoplasms. *Blood* **127**, 2375–2390 (2016).
- WHO | International Classification of Diseases for Oncology, 3rd Edition (ICD-O-3), 1<sup>st</sup> revision. WHO <http://www.who.int/classifications/icd/adaptations/oncology/en/> (2013)
